# Supplementary material for: Inner blood-retina barrier involvement in dry age-related macular degeneration (AMD) pathology
Source: PubMed Central journal article supplement — Neural Regen Res. 2020 Feb 28;15(9):1656–7. doi: 10.4103/1673-5374.276332 (PMC7437601; doi:10.4103/1673-5374.276332), 2020-02-28
Supplement: NRR-15-1656_Suppl1.pdf [file NRR-15-1656_Suppl1.pdf]

## OPEN PEER REVIEW REPORT 1

**Name of journal:** Neural Regeneration Research

**Manuscript NO:** NRR-D-19-00698

**Title:** Inner blood-retina barrier involvement in dry AMD pathology

**Reviewer's Name:** Pio Conti

**Reviewer's country:** Italy

### COMMENTS TO AUTHORS

- The study states that claudin-5 is a key mediator in initiating AMD pathology. The authors conclude that the restoration of claudin-5 dynamic expression in aging the eye can prevent or even stop the progression of AMD.
- In the title AMD should be put in full.
- We know that the oxidative damage of the retinal pigment is very important, as is apoptosis. I would briefly talk about this topic. Therefore, to make this paper more interesting for the readers of this important journal, the authors should expand the discussion. Here, below, I report a recent interesting paper that should be studied, the meaning incorporated and reported briefly in the discussion and in the list of references.
- Role and influence of p75NTR receptor on antioxidative damage of retinal pigment epithelial cells. Liu HW, Meng Y, Zhang J, Ren YB, Li YC, Wang Y, Wang JJ. J Biol Regul Homeost Agents. 2018 Nov-Dec;32(6):1379-1387.
